# Supplementary material for: Evaluating consistency between total column CO 2 retrievals from OCO-2 and the in situ network over North America: implications for carbon flux estimation
Source: Copernicus journal article supplement (doi:10.5194/acp-21-14385-2021), 2021-09-28

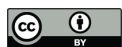

*Supplement of*

## **Evaluating consistency between total column CO<sub>2</sub> retrievals from OCO-2 and the in situ network over North America: implications for carbon flux estimation**

**Bharat Rastogi et al.**

*Correspondence to:* Bharat Rastogi ([bharat.rastogi@noaa.gov](mailto:bharat.rastogi@noaa.gov))

The copyright of individual parts of the supplement might differ from the article licence.

This document contains scatterplots showing the difference between simulations and OCO-2 retrievals ( $\Delta X_{CO_2}$ ) and several parameters, some of which are used in the bias correction of OCO-2  $X_{CO_2}$ . In each figure, the top row contains correlations between a parameter of interest (e.g. AOD) and the difference between bias corrected and 'raw' OCO-2 retrievals (i.e.,  $\Delta X_{ret-ret,bc}$ ). The middle row contains correlations between a parameter of interest and the difference between simulated  $X_{CO_2}$  and OCO-2 retrievals prior to the bias correction ( $\Delta X_{sim-ret}$ ). Finally, the third row shows correlations between a parameter of interest and the difference between bias corrected OCO-2 and simulated  $X_{CO_2}$  (i.e.,  $\Delta X_{ret,bc-sim}$ ). All parameters compared here are obtained from the OCO-2 v10 lite files, obtained at <https://disc.gsfc.nasa.gov/datasets?page=1&keywords=OCO-2>, last accessed on August 7, 2021

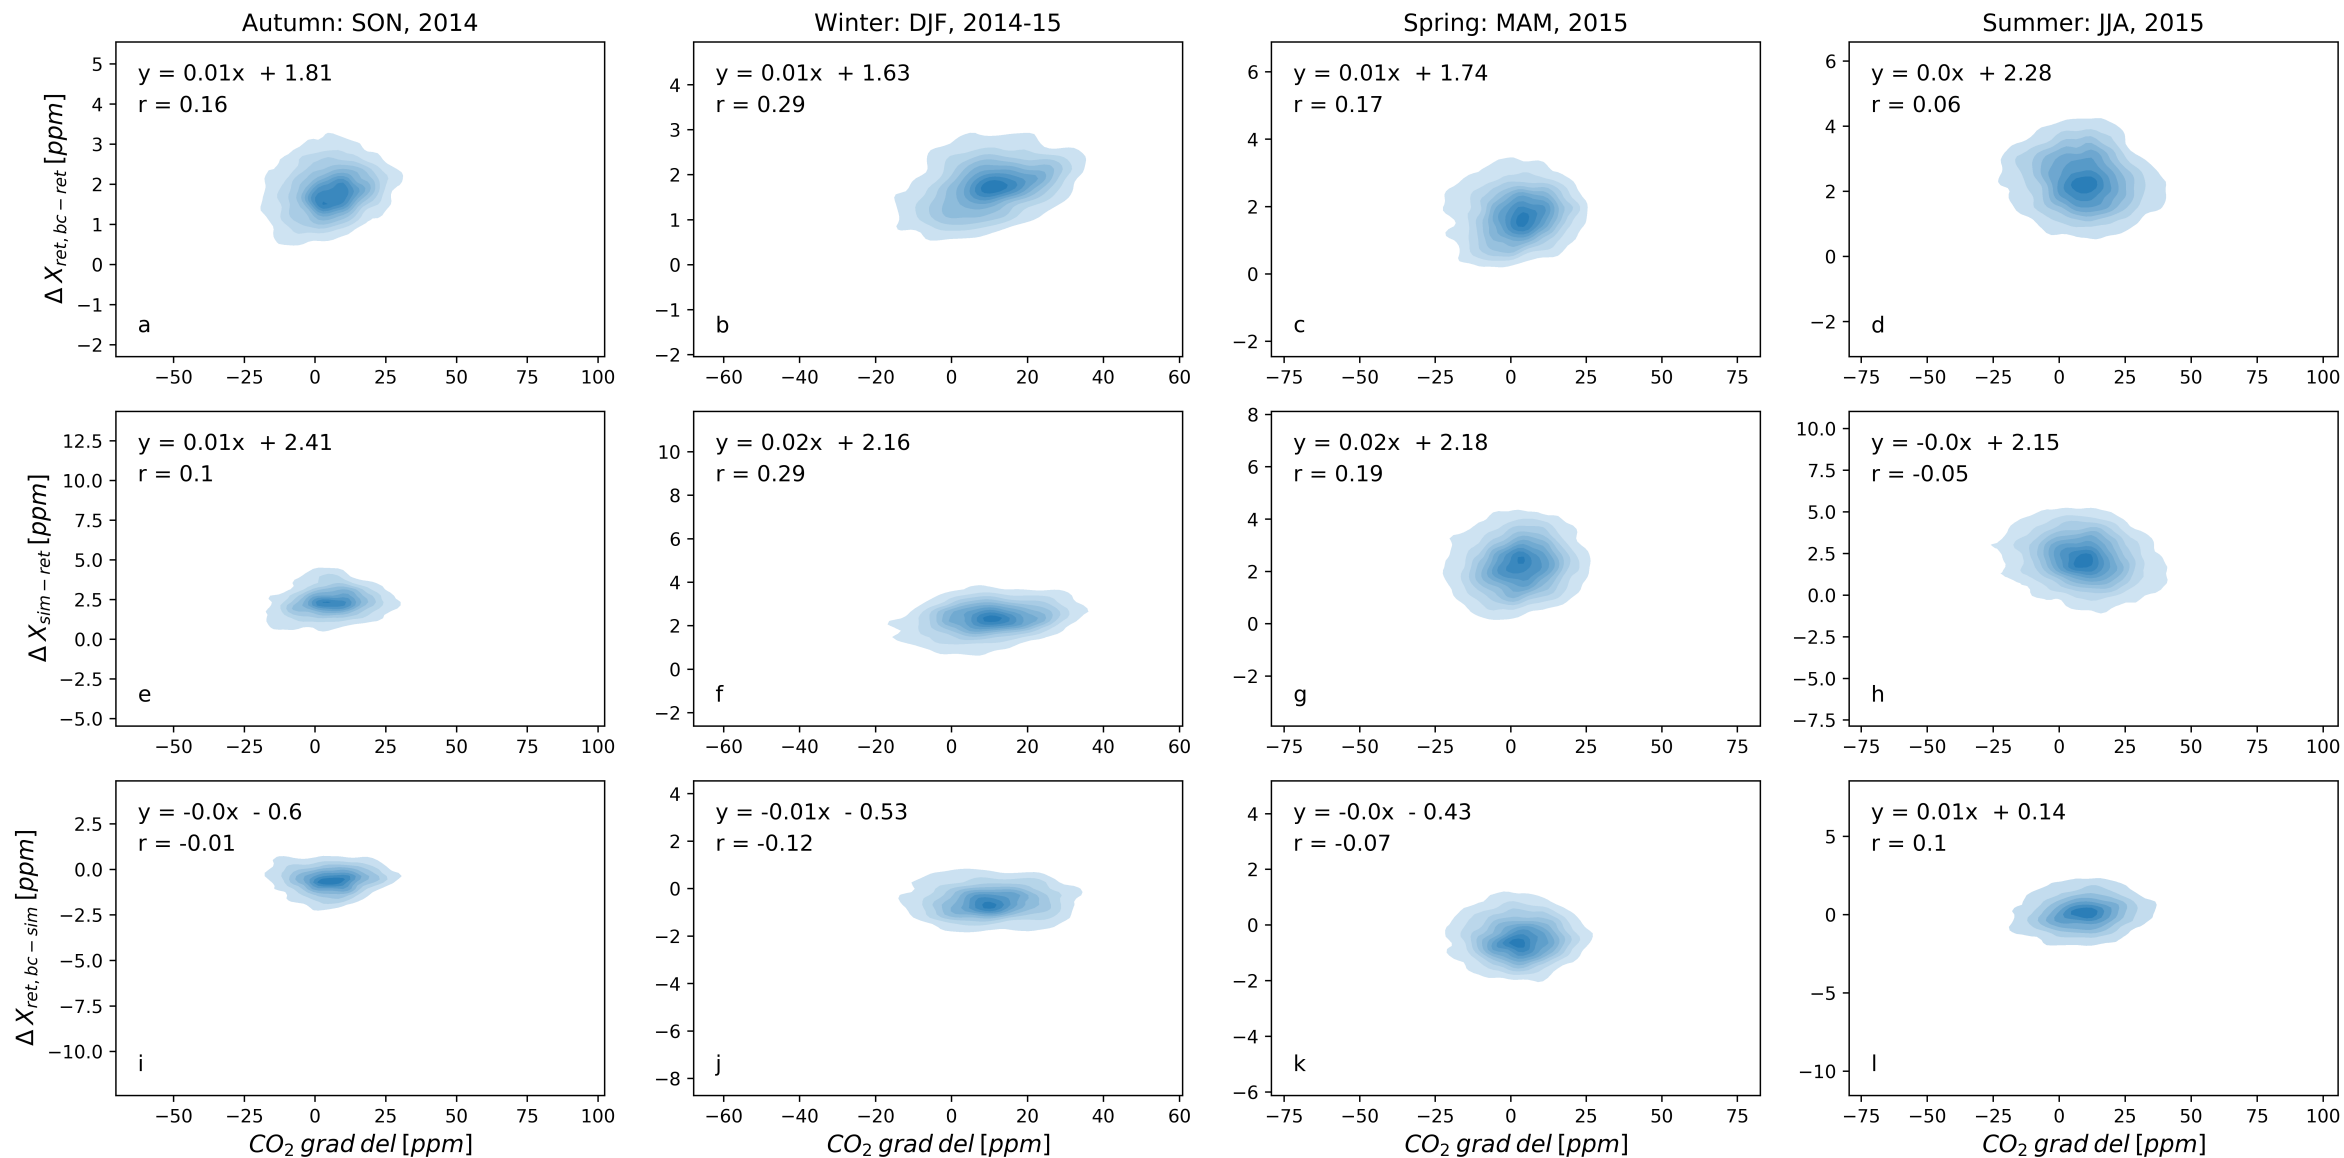

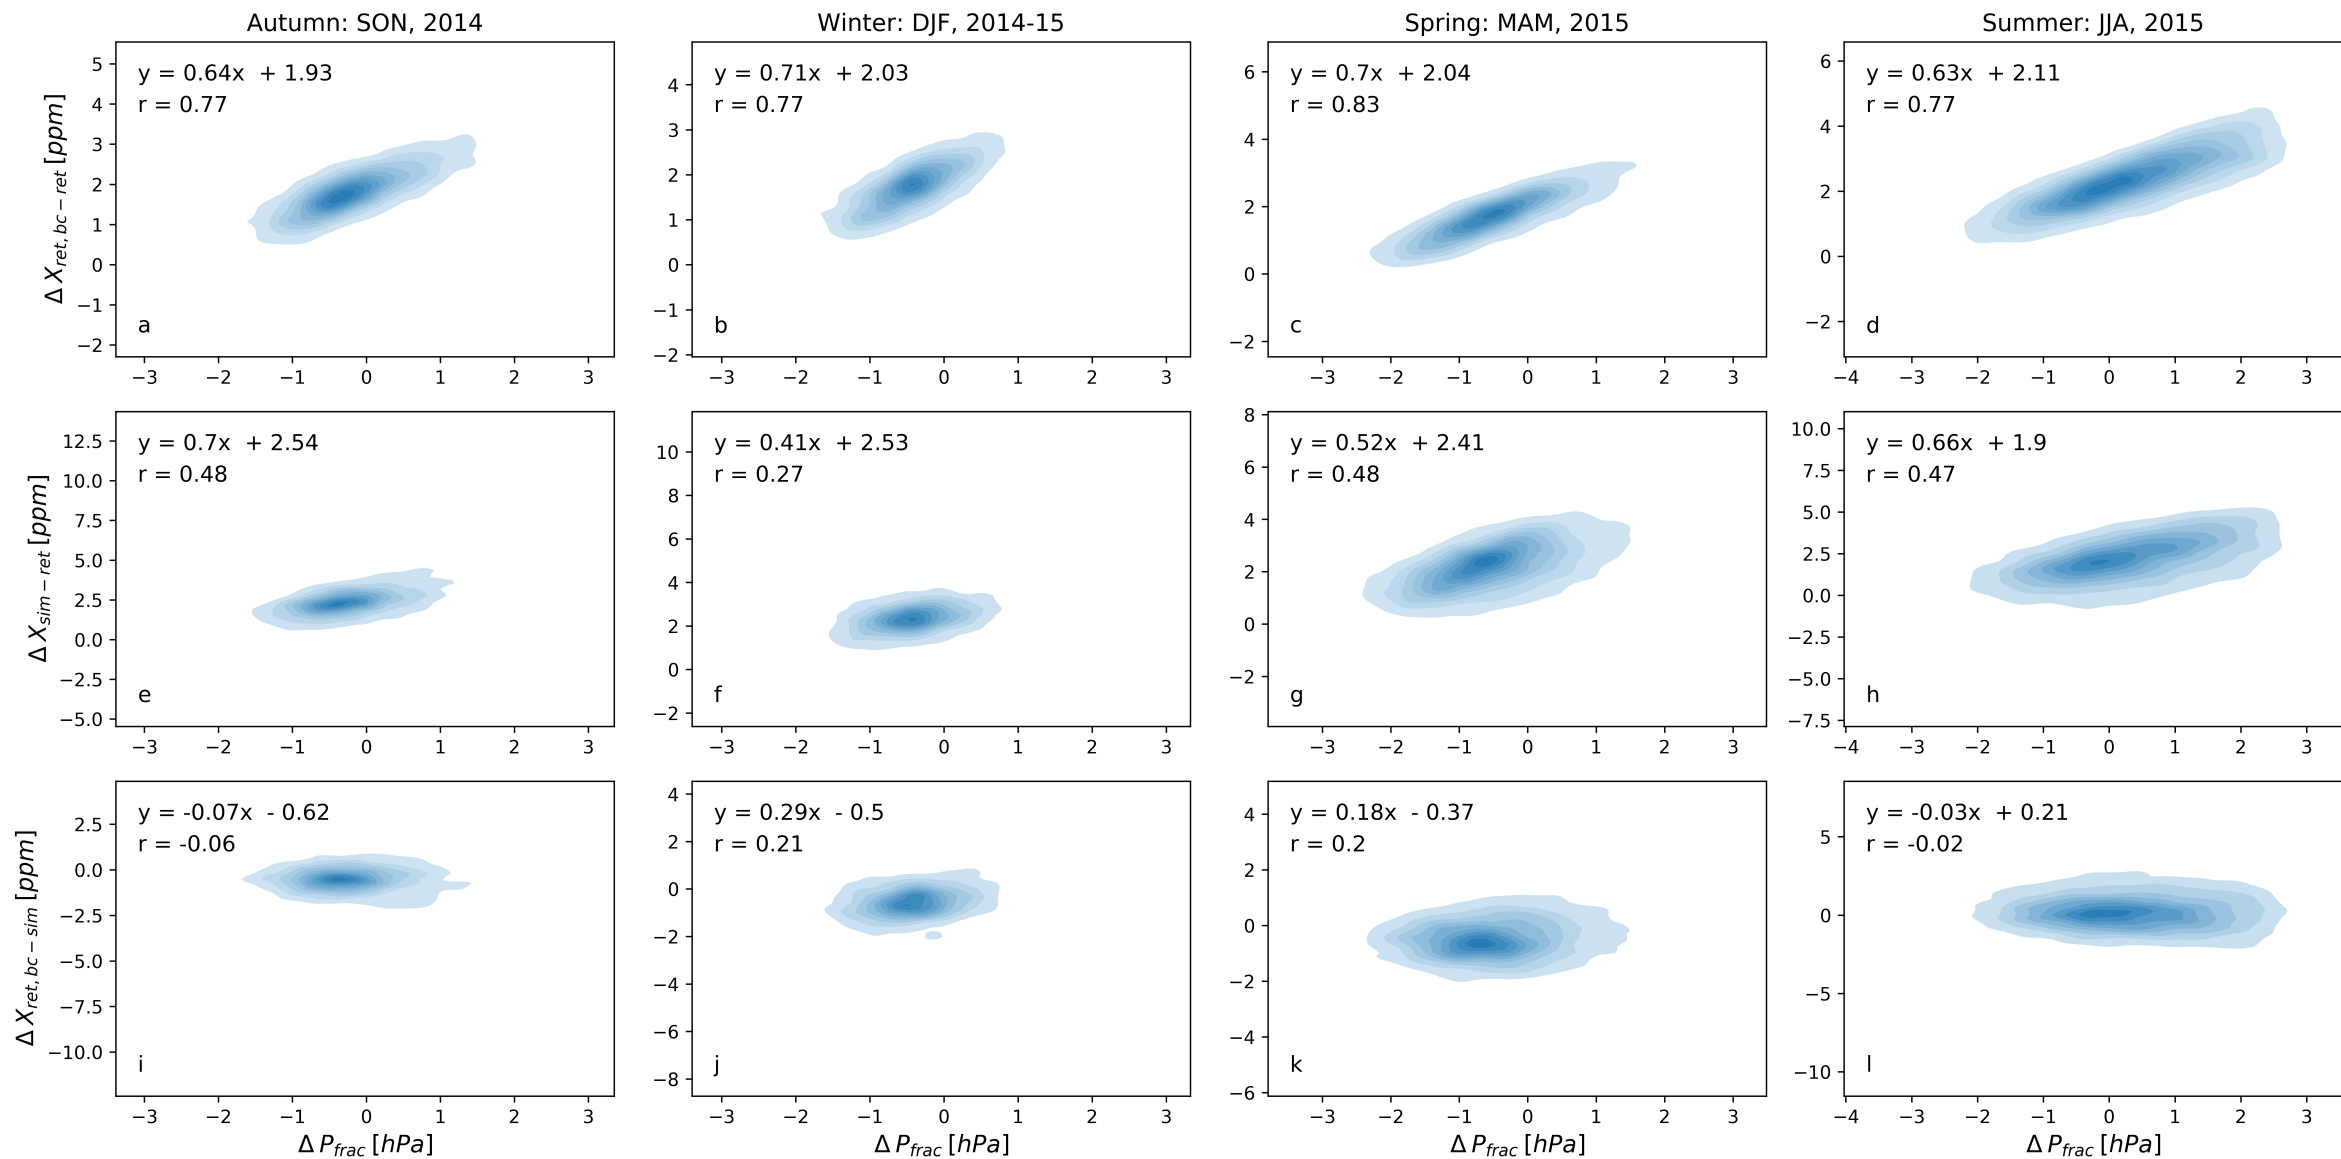



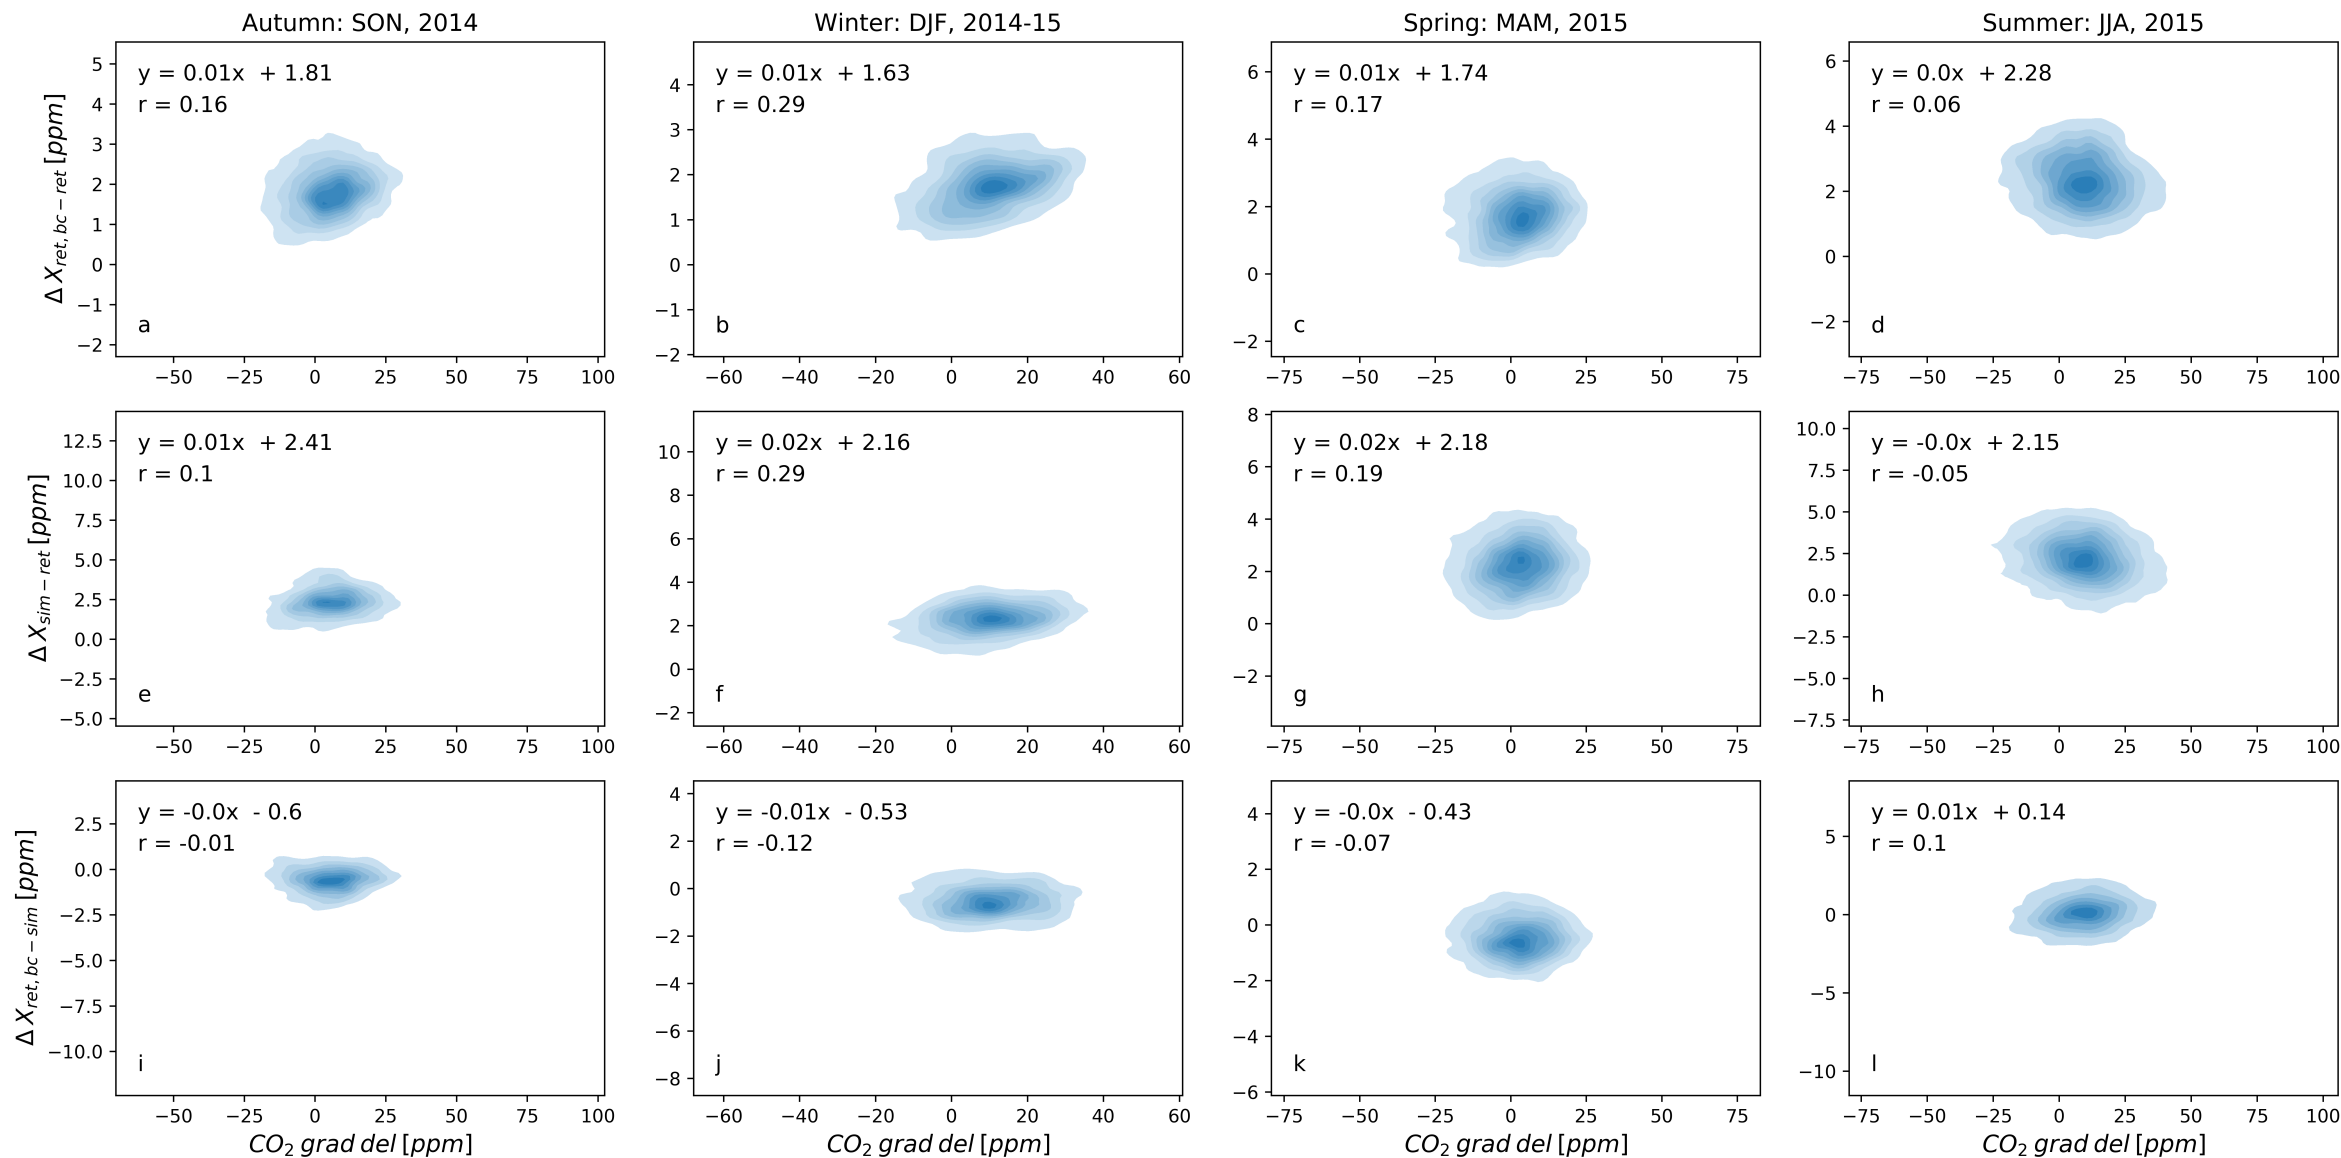

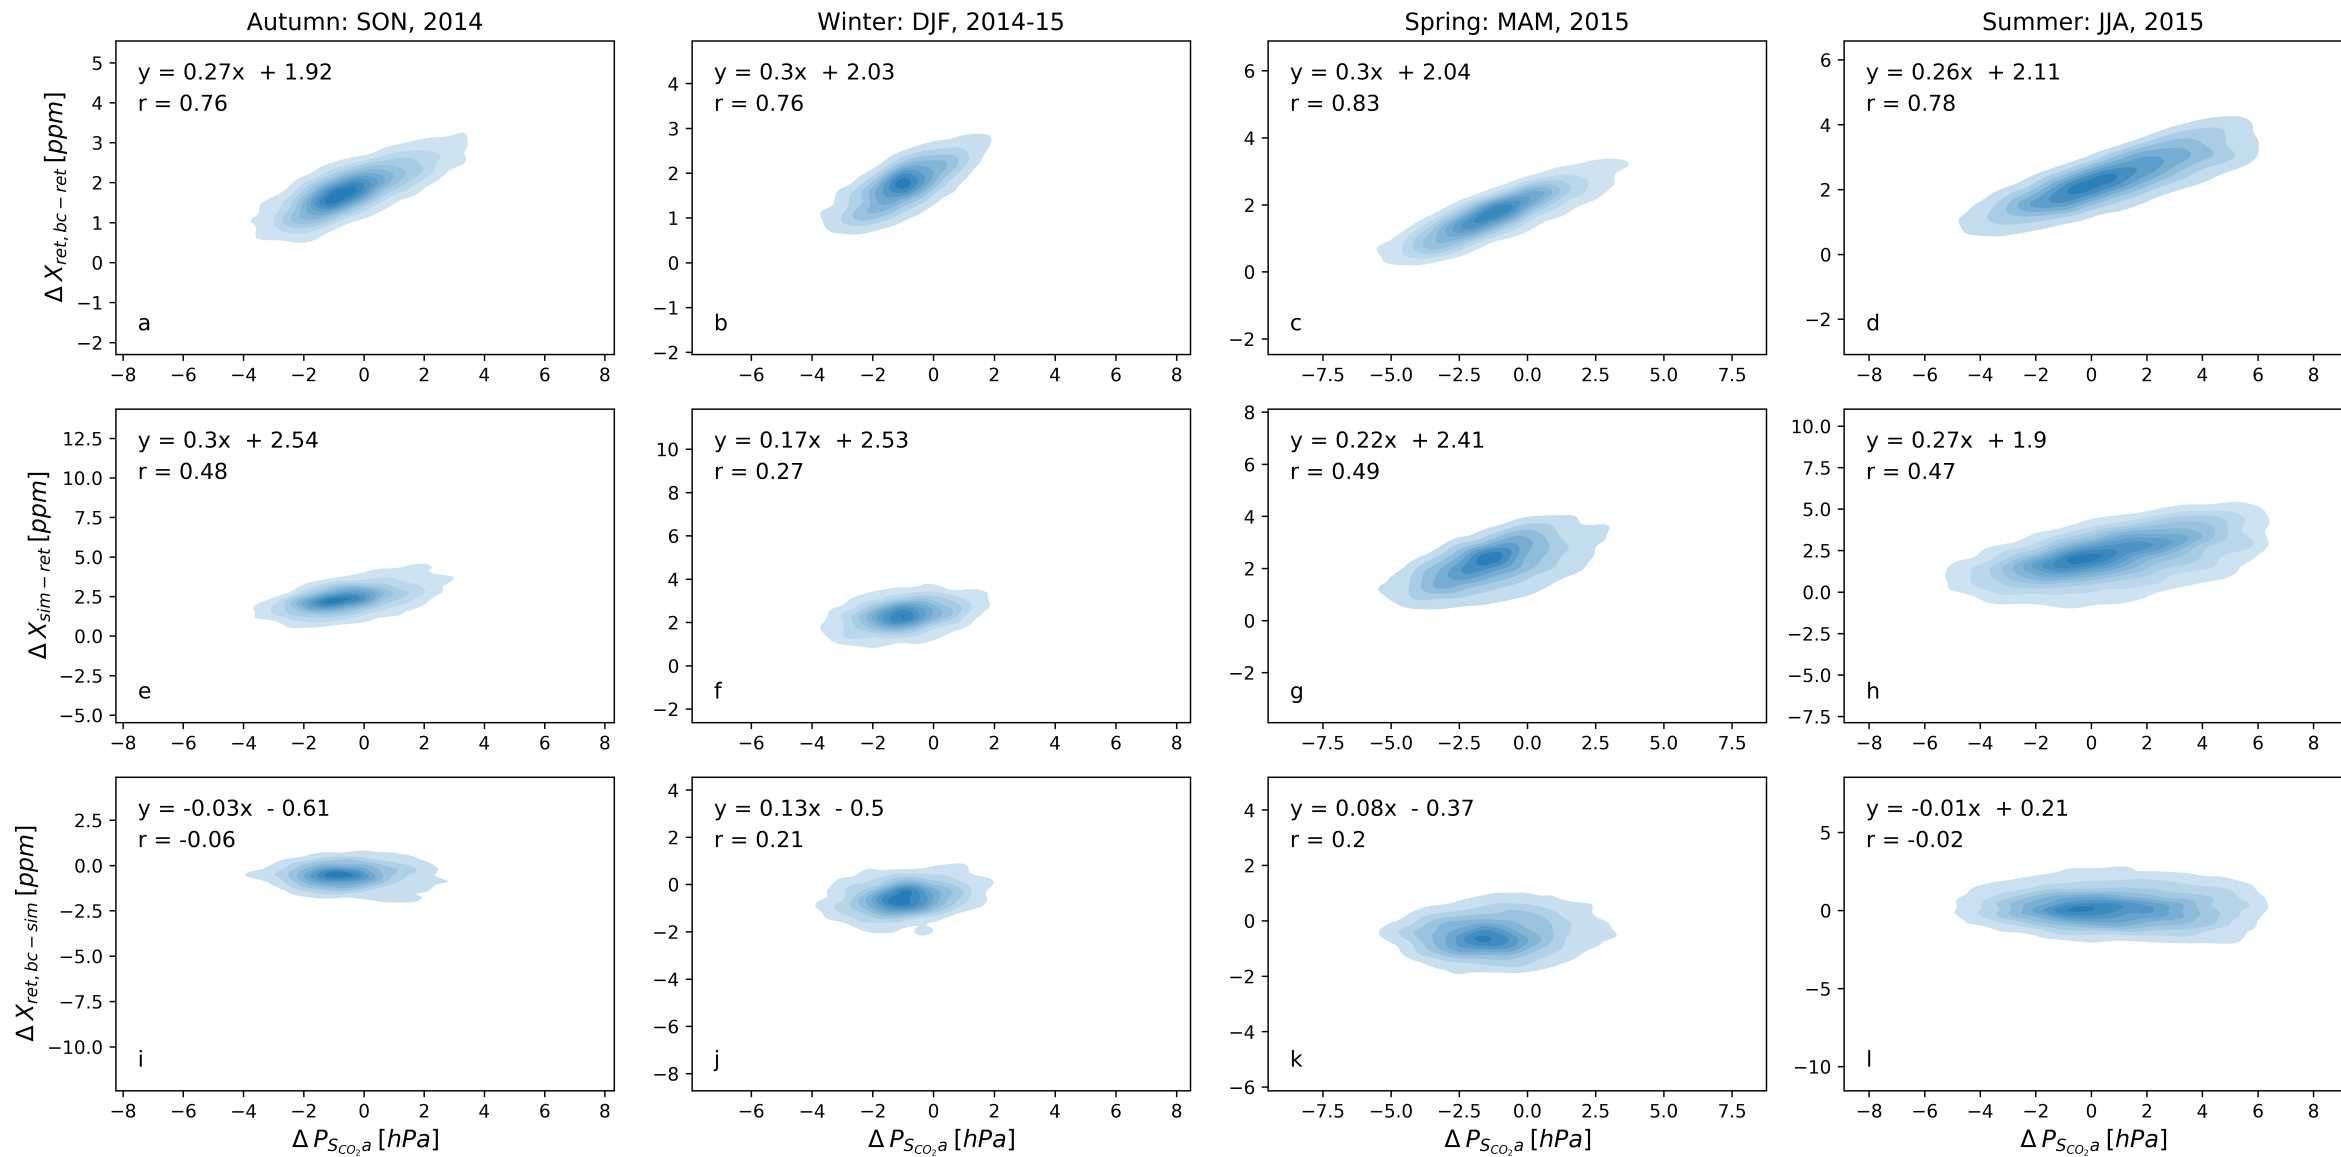

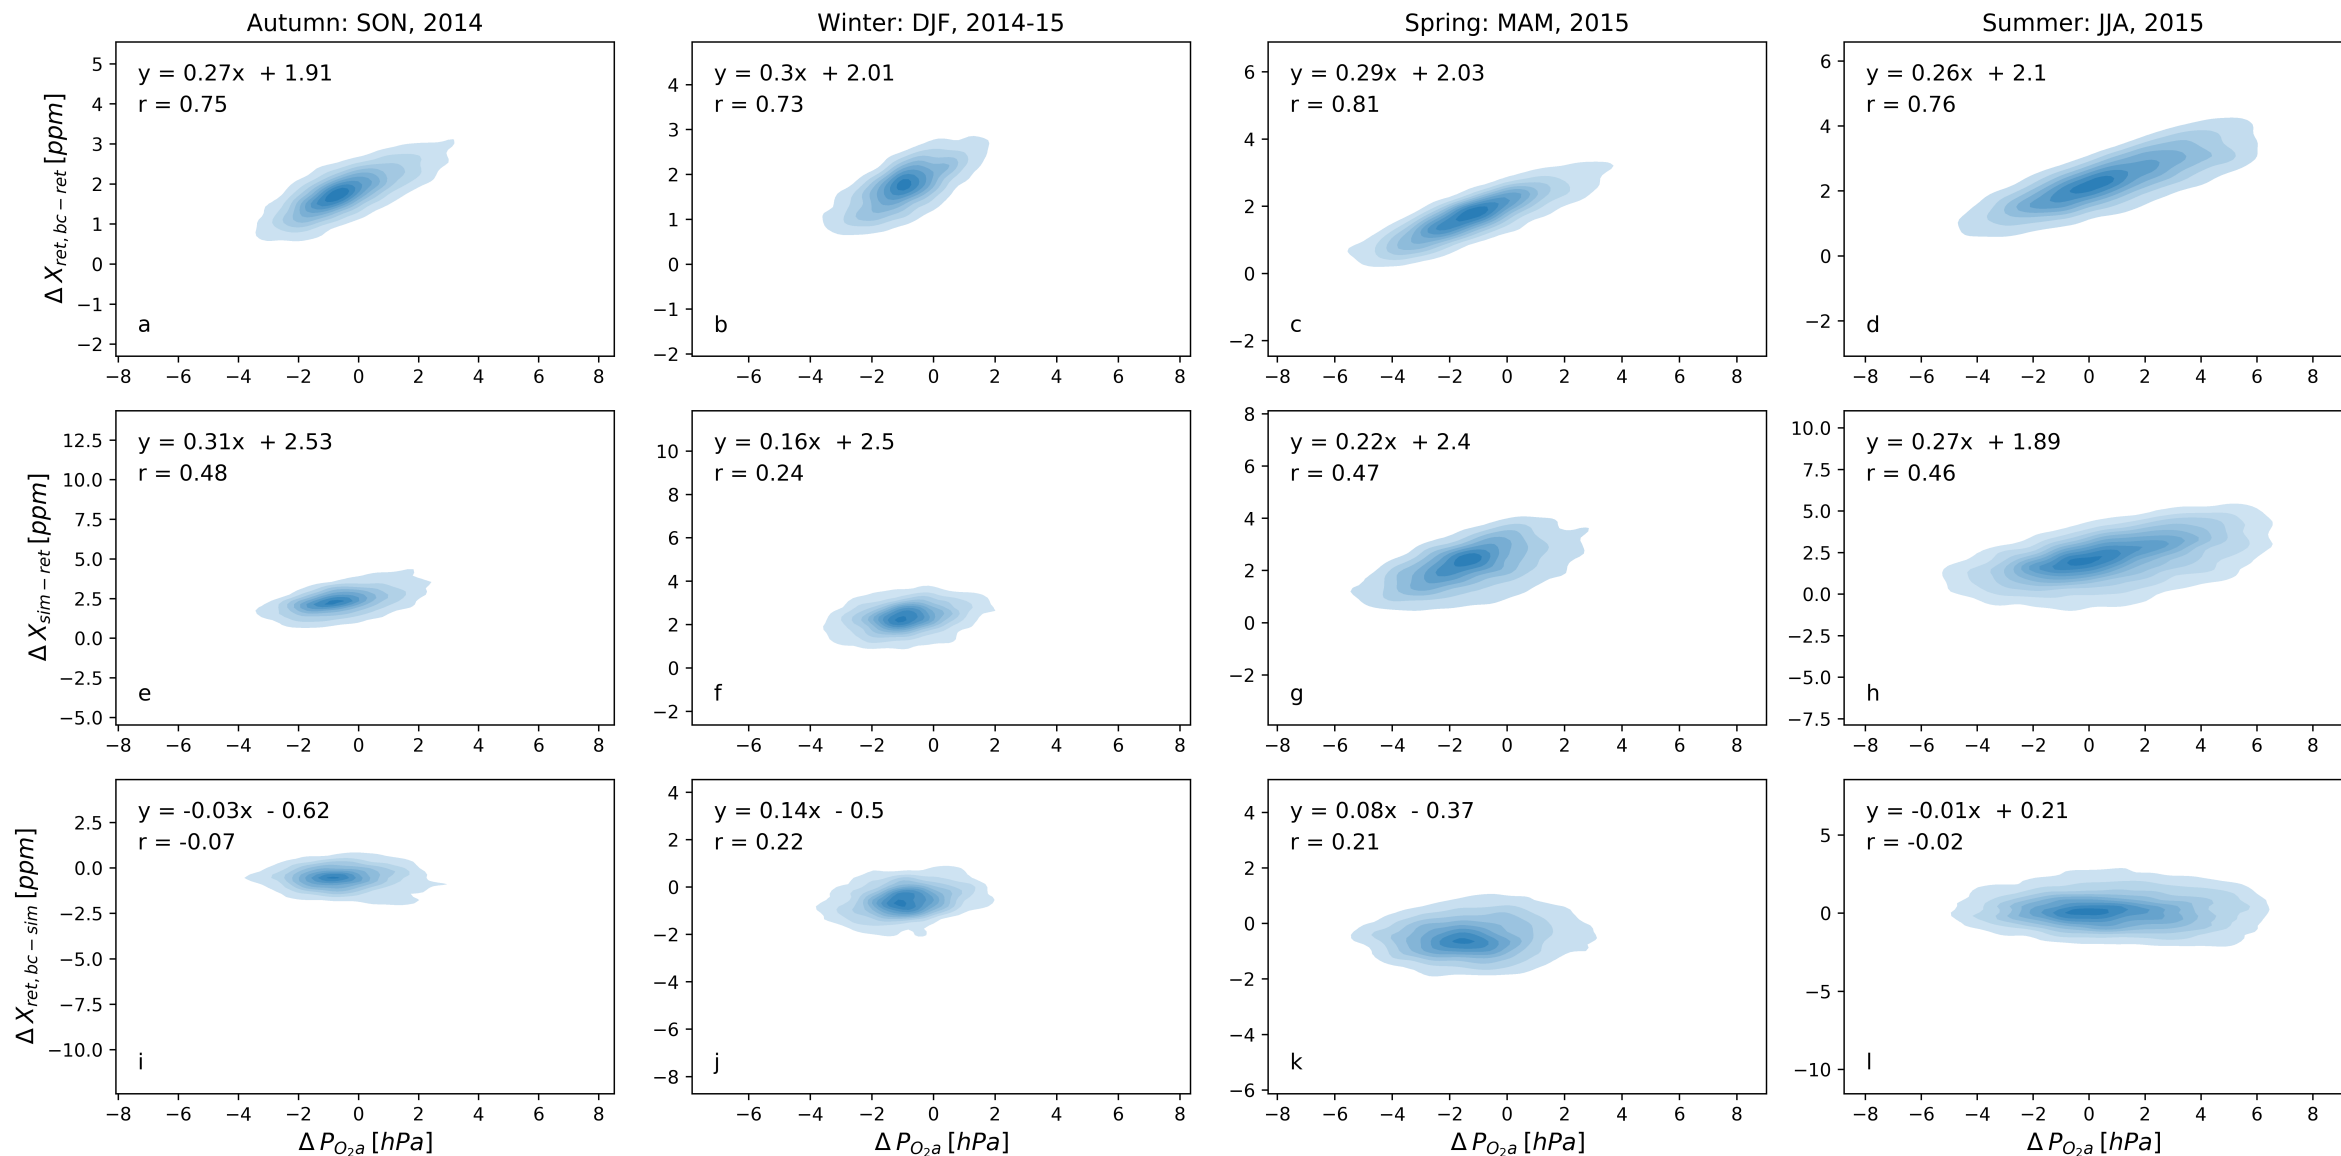

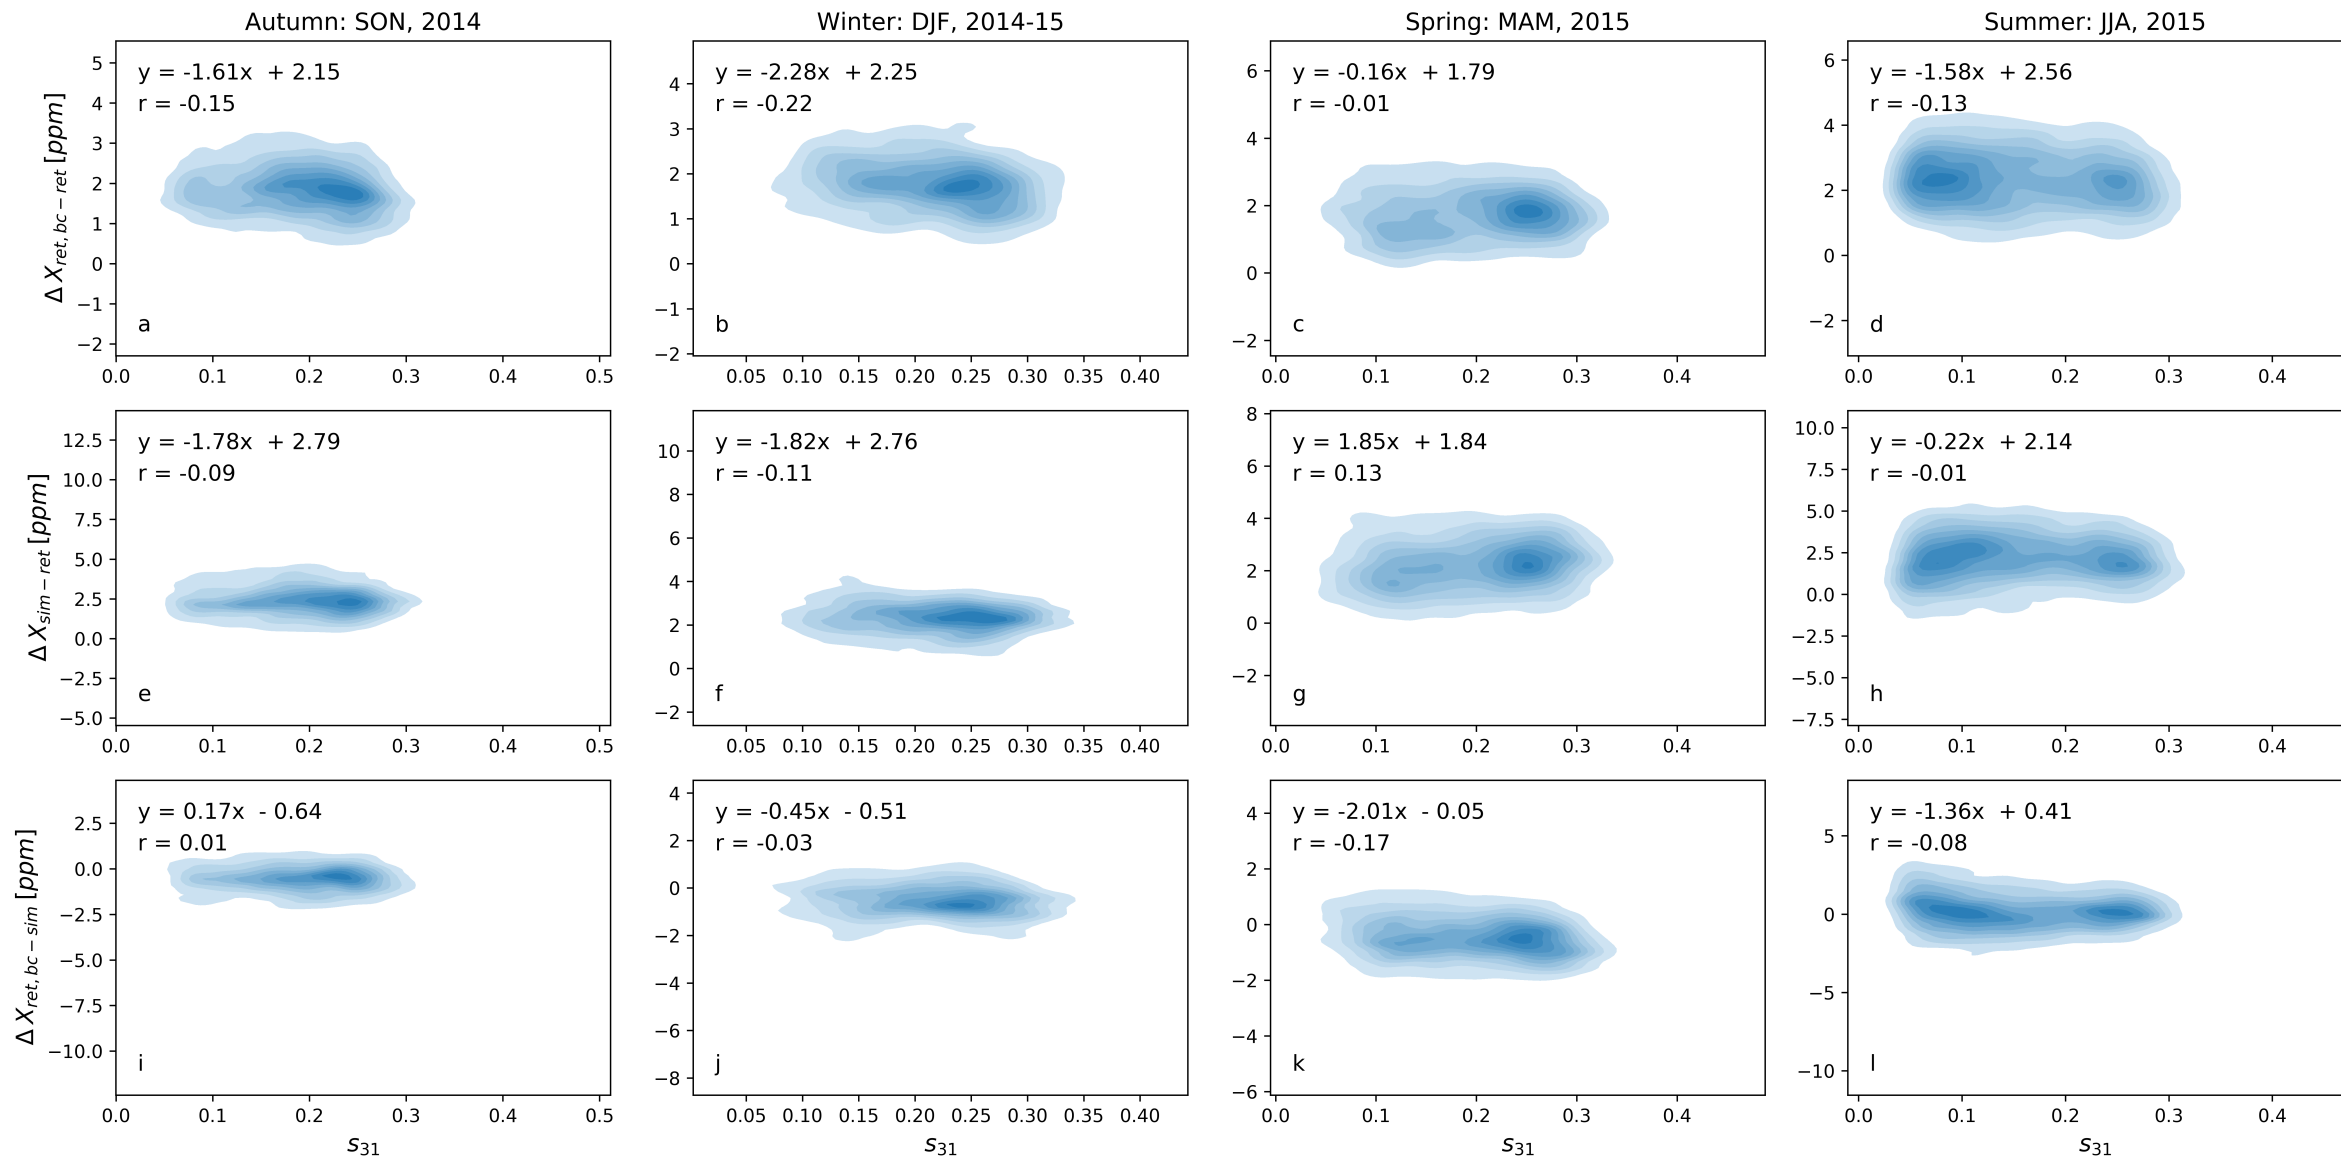

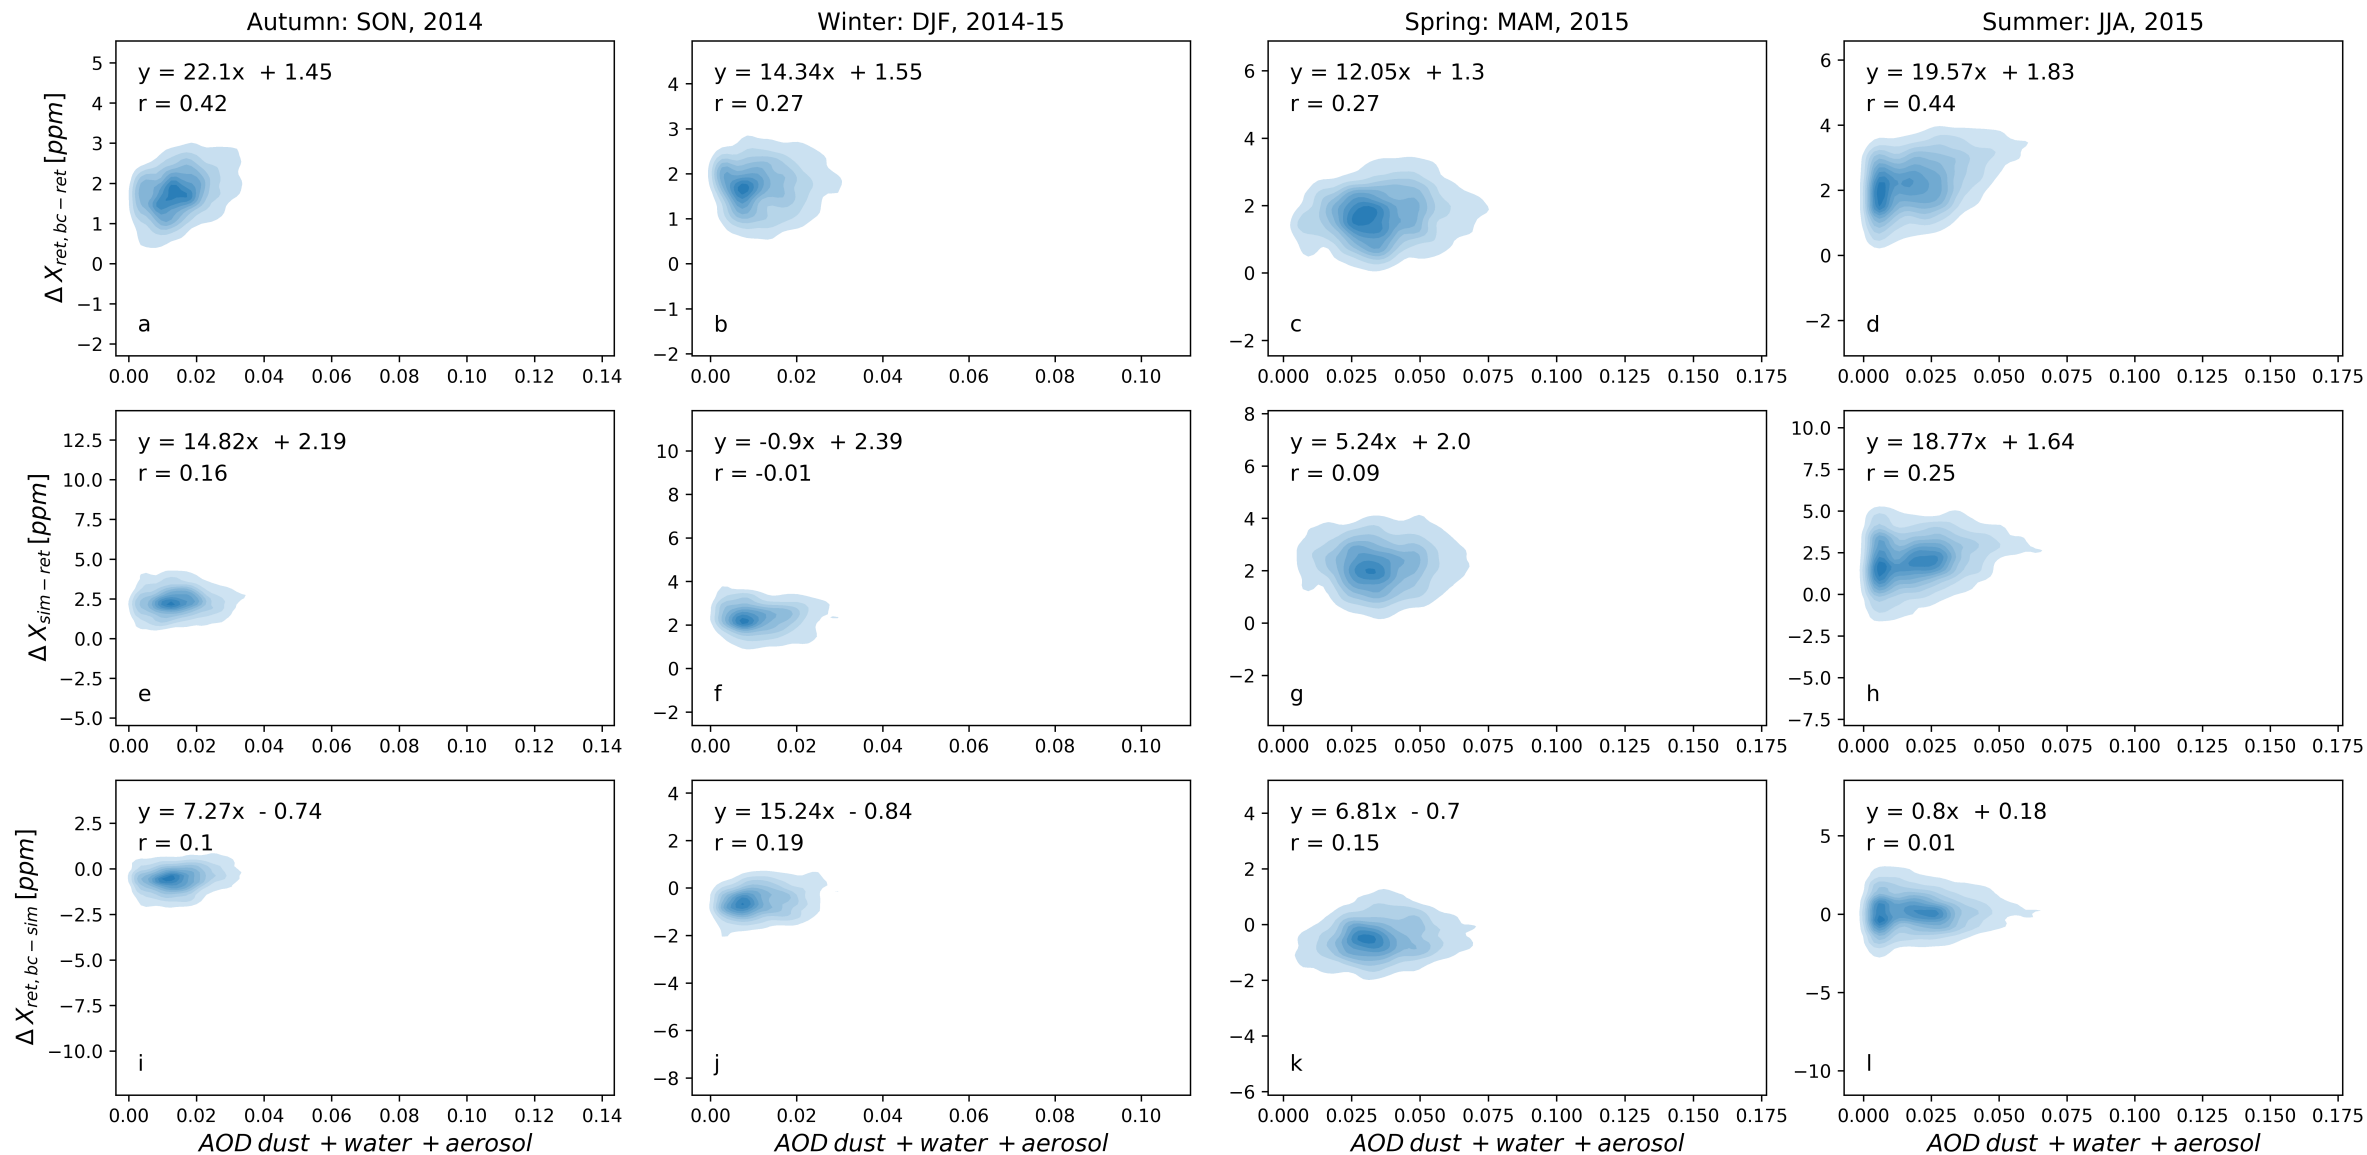

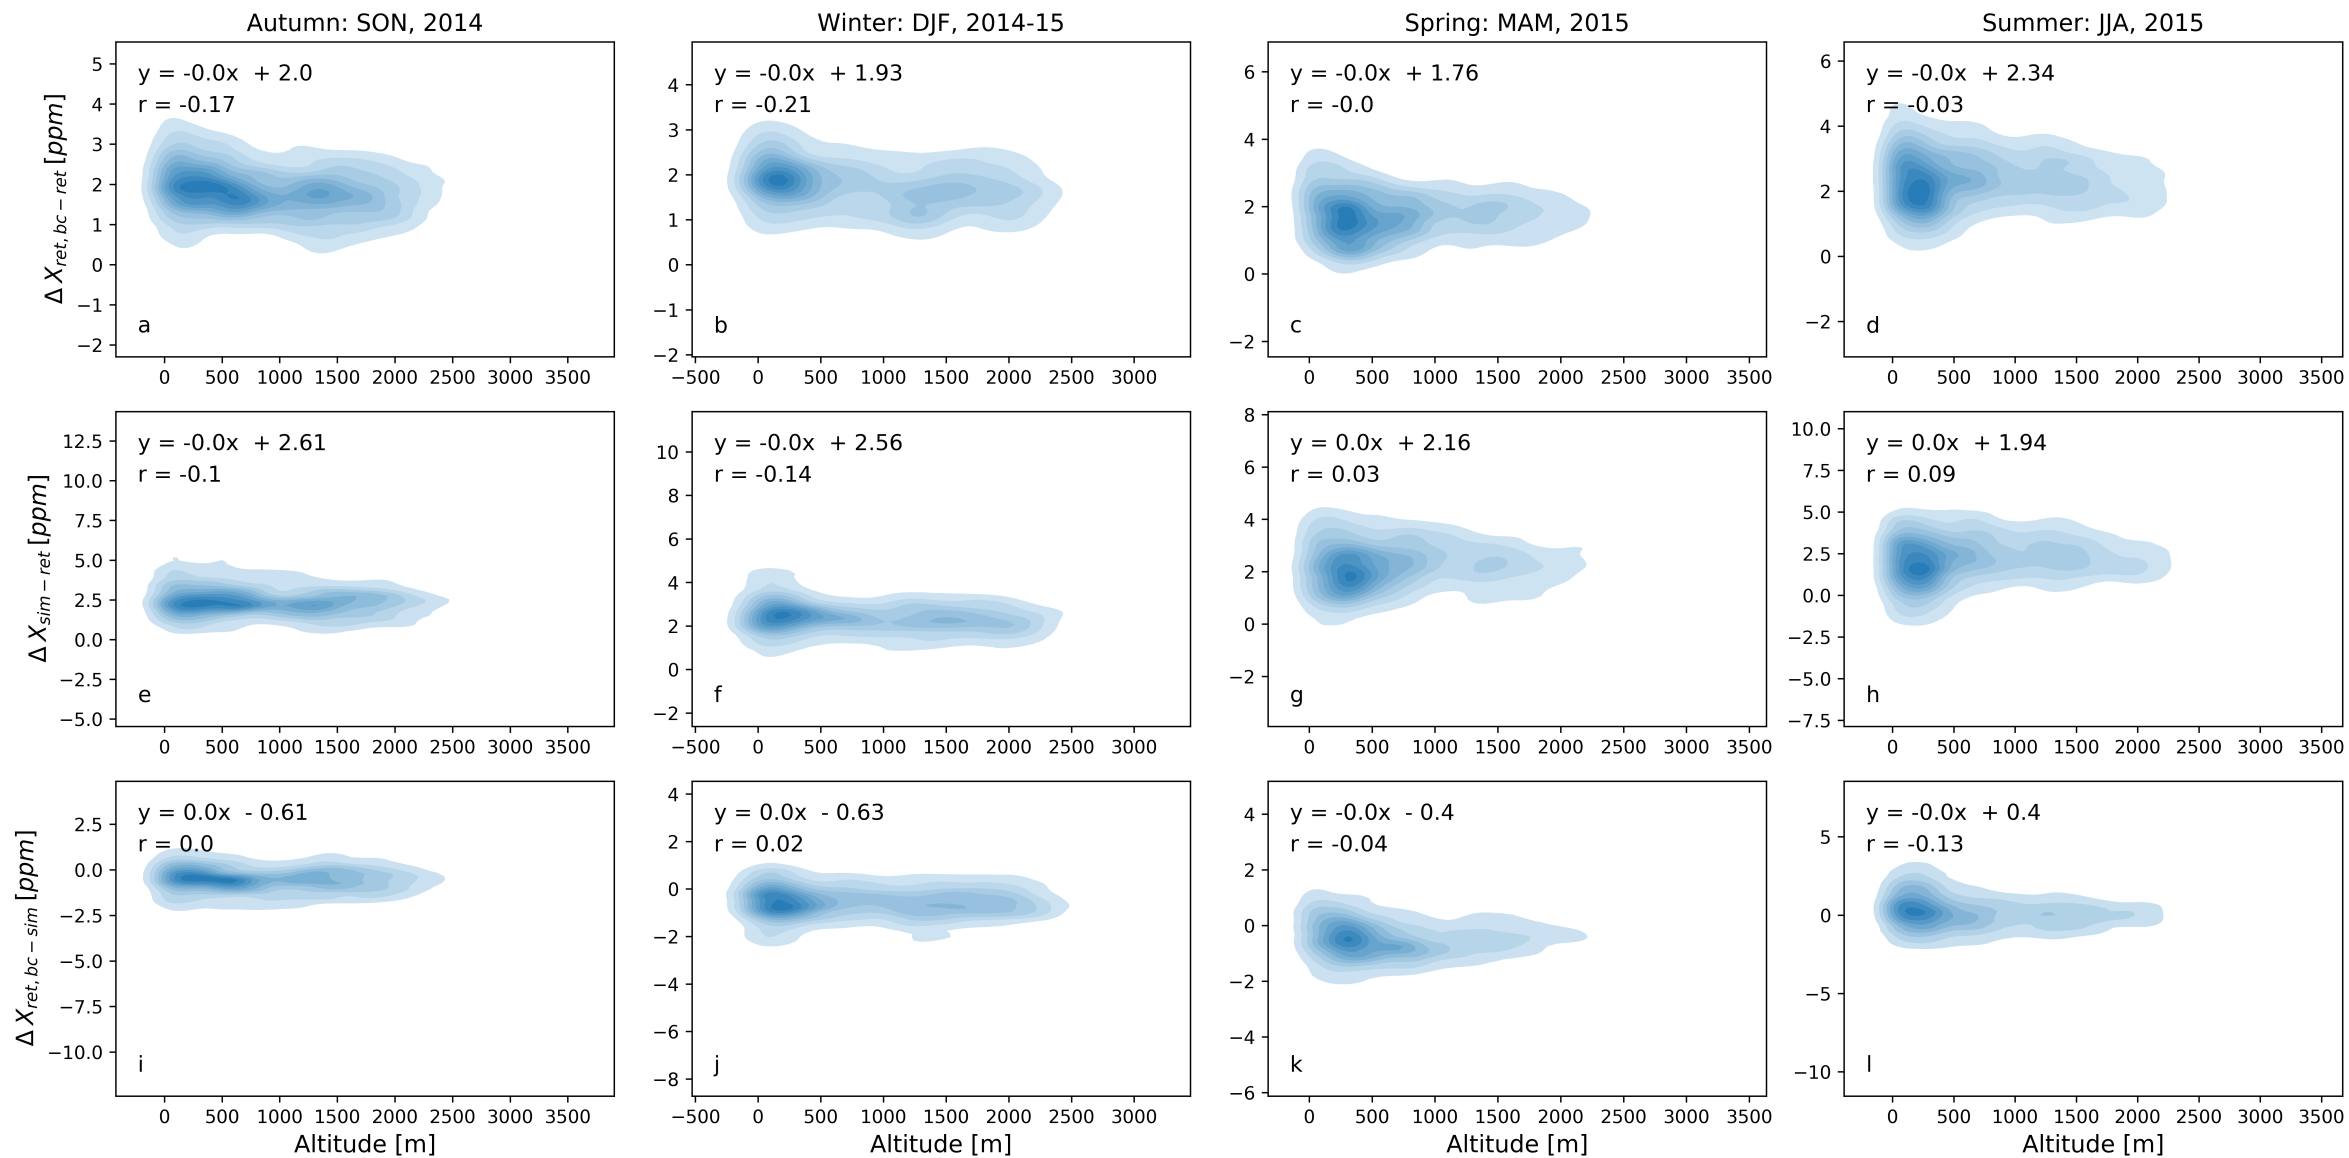

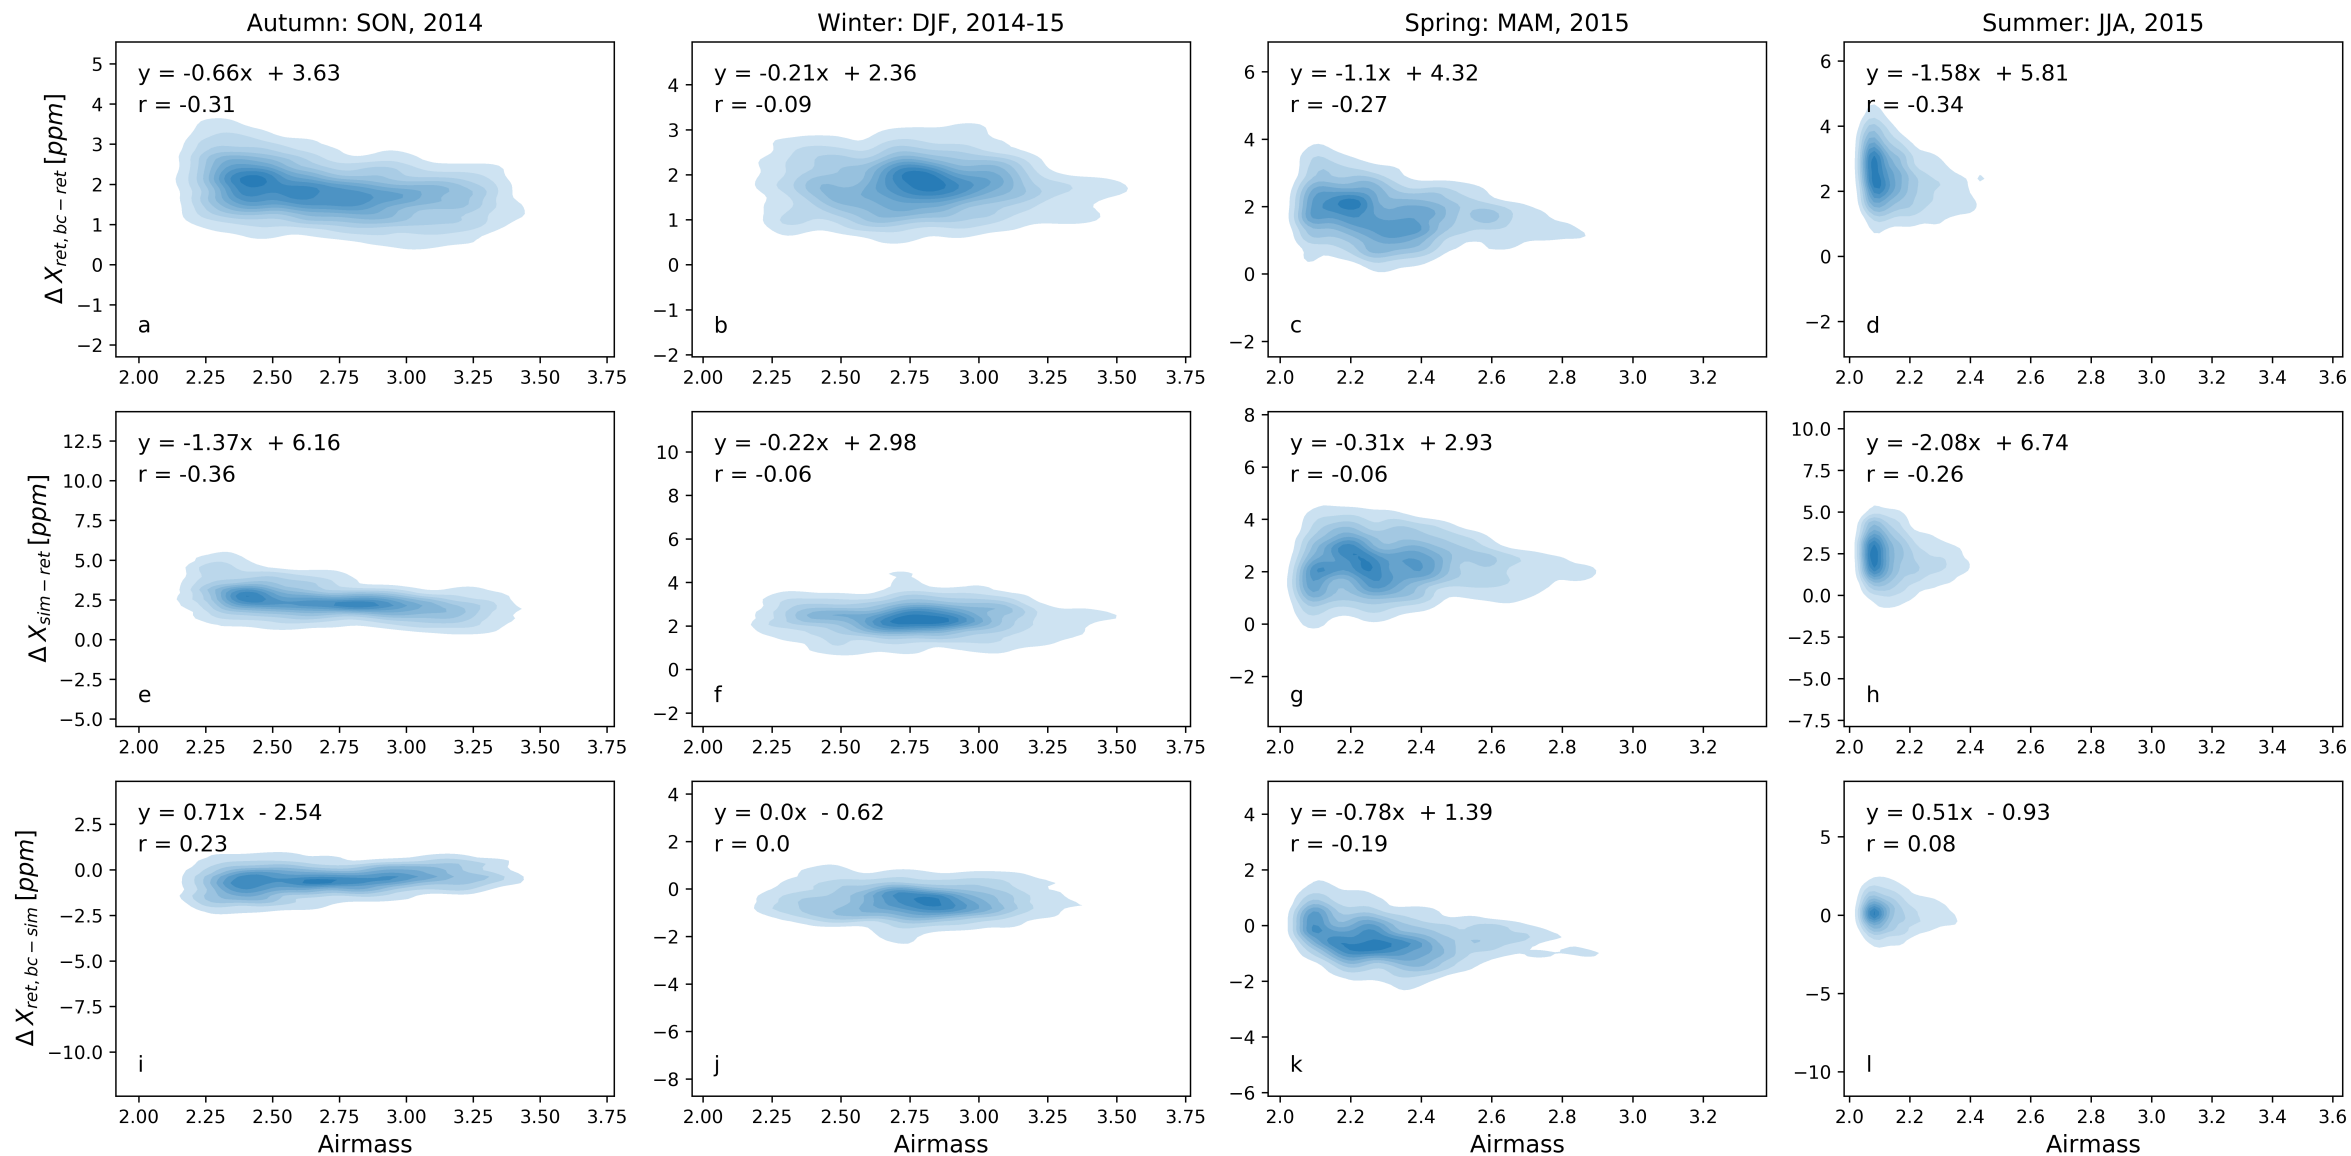

Supplement: Supplementary file 1 [file acp-21-14385-2021-supplement.pdf]
